# Supplementary material for: Association of triglyceride-glucose index and its related parameters with atherosclerotic cardiovascular disease: evidence from a 15-year follow-up of Kailuan cohort
Source: PubMed Central journal article supplement (PMC11188278; doi:10.1186/s12933-024-02290-3), 2024-06-19
Supplement: 12933_2024_2290_MOESM1_ESM.pdf [file 12933_2024_2290_MOESM1_ESM.pdf]

**Association of triglyceride-glucose index and its related parameters with  
atherosclerotic cardiovascular disease: evidence from a 15-year follow-up of  
Kailuan cohort**

**Additional files**

|                                                                                                                                                                                                 |    |
|-------------------------------------------------------------------------------------------------------------------------------------------------------------------------------------------------|----|
| Supplementary Table 1. Baseline characteristics of participants according to TyG-BMI quartiles. ....                                                                                            | 2  |
| Supplementary Table 2. Baseline characteristics of participants according to TyG-WC quartiles. ....                                                                                             | 4  |
| Supplementary Table 3. Baseline characteristics of participants according to TyG-WHtR quartiles. ....                                                                                           | 6  |
| Supplementary Table 4. Coefficient (95%CI) of each covariate included in the Cox regression models. ....                                                                                        | 8  |
| Supplementary Table 5. Subgroup analyses of TyG and its related parameters with atherosclerotic cardiovascular disease. ....                                                                    | 14 |
| Supplementary Table 6. Sensitivity analyses for association of TyG and its related parameters with atherosclerotic cardiovascular disease and its subtypes. ....                                | 20 |
| Supplementary Figure 1. Flow chart of participants included and excluded in the analyses. ....                                                                                                  | 26 |
| Supplementary Figure 2. Restricted cubic spline curves of the association of triglyceride-glucose and its related parameters with atherosclerotic cardiovascular disease and its subtypes. .... | 27 |

**Supplementary Table 1. Baseline characteristics of participants according to TyG-BMI quartiles.**

|                                 | Overall              | Quartiles of TyG-BMI |                      |                      |                      | <i>P</i> for trend |
|---------------------------------|----------------------|----------------------|----------------------|----------------------|----------------------|--------------------|
|                                 |                      | Quartile 1           | Quartile 2           | Quartile 3           | Quartile 4           |                    |
| Range of TyG-BMI                |                      | <189.0               | 189.0-214.4          | 214.4-242.2          | ≥242.2               |                    |
| No. of participants             | 95342                | 23835                | 23836                | 23835                | 23836                |                    |
| Age, years, Median (IQR)        | 59.0<br>(51.0, 66.2) | 57.2<br>(48.7, 66.0) | 59.0<br>(51.4, 66.1) | 59.7<br>(52.0, 67.0) | 59.0<br>(51.1, 66.0) | <0.001             |
| Male, N (%)                     | 75880 (79.6)         | 17397 (73.0)         | 19078 (80.0)         | 19719 (82.7)         | 19686 (82.6)         | <0.001             |
| High school or above, N (%)     | 18674 (19.6)         | 5701 (23.9)          | 4416 (18.5)          | 4304 (18.1)          | 4253 (17.8)          | <0.001             |
| Monthly income ≥ 600 CNY, N (%) | 6151 (6.6)           | 1583 (6.8)           | 1502 (6.5)           | 1579 (6.8)           | 1487 (6.4)           | 0.210              |
| Married, N (%)                  | 87453 (94.4)         | 21470 (92.6)         | 21886 (94.6)         | 22002 (95.2)         | 22095 (95.3)         | <0.001             |
| Current smoking, N (%)          | 32037 (34.3)         | 7964 (34.2)          | 7982 (34.3)          | 8010 (34.4)          | 8081 (34.6)          | 0.396              |
| Current drinking, N (%)         | 35028 (37.5)         | 8443 (36.2)          | 8727 (37.5)          | 8826 (37.8)          | 9032 (38.6)          | <0.001             |
| Active physical activity, N (%) | 14022 (15.2)         | 3387 (14.6)          | 3551 (15.4)          | 3537 (15.3)          | 3547 (15.3)          | 0.057              |

|                                | Overall                 | Quartiles of TyG-BMI    |                         |                         |                         | <i>P</i> for trend |
|--------------------------------|-------------------------|-------------------------|-------------------------|-------------------------|-------------------------|--------------------|
|                                |                         | Quartile 1              | Quartile 2              | Quartile 3              | Quartile 4              |                    |
| Family history of ASCVD, N (%) | 10728 (11.3)            | 2458 (10.3)             | 2667 (11.2)             | 2755 (11.6)             | 2848 (11.9)             | <0.001             |
| Hypertension, N (%)            | 32287 (34.0)            | 4418 (18.6)             | 6993 (29.5)             | 9147 (38.5)             | 11729 (49.3)            | <0.001             |
| Diabetes, N (%)                | 8629 (9.1)              | 548 (2.3)               | 1216 (5.1)              | 2263 (9.5)              | 4602 (19.3)             | <0.001             |
| Hyperlipidemia, N (%)          | 12113 (12.7)            | 1787 (7.5)              | 2618 (11.0)             | 3366 (14.1)             | 4342 (18.2)             | <0.001             |
| CKD, N (%)                     | 18972 (19.9)            | 3307 (13.9)             | 4512 (18.9)             | 5126 (21.5)             | 6027 (25.3)             | <0.001             |
| TyG, Median (IQR)              | 8.6 (8.2, 9.1)          | 8.1 (7.8, 8.4)          | 8.4 (8.2, 8.7)          | 8.7 (8.4, 9.1)          | 9.2 (8.8, 9.7)          | <0.001             |
| TyG-WC, Median (IQR)           | 747.1<br>(671.6, 830.2) | 632.6<br>(585.8, 682.8) | 713.6<br>(673.9, 756.2) | 779.0<br>(735.7, 824.3) | 872.4<br>(816.8, 933.2) | <0.001             |
| TyG-WHtR, Median (IQR)         | 4.5 (4.0, 5.0)          | 3.8 (3.5, 4.1)          | 4.3 (4.0, 4.5)          | 4.6 (4.4, 4.9)          | 5.2 (4.9, 5.6)          | <0.001             |

Values were represented by median (IQR) for continuous variables and frequency (percentage) for categorical variables.

Abbreviations: ASCVD, atherosclerotic cardiovascular disease; BMI, body mass index; CKD, chronic kidney disease; IQR, interquartile range; TyG, triglyceride-glucose; WC, waist circumference; WHtR, Waist-to-Height ratio.

**Supplementary Table 2. Baseline characteristics of participants according to TyG-WC quartiles.**

|                                 | Overall              | Quartiles of TyG-WC  |                      |                      |                      | <i>P</i> for trend |
|---------------------------------|----------------------|----------------------|----------------------|----------------------|----------------------|--------------------|
|                                 |                      | Quartile 1           | Quartile 2           | Quartile 3           | Quartile 4           |                    |
| Range of TyG-WC                 |                      | <671.6               | 671.6-747.1          | 747.1-830.2          | ≥830.2               |                    |
| No. of participants             | 95342                | 23835                | 23836                | 23835                | 23836                |                    |
| Age, years, Median (IQR)        | 59.0<br>(51.0, 66.2) | 55.0<br>(47.0, 64.0) | 58.8<br>(51.0, 66.0) | 60.0<br>(52.5, 67.0) | 60.7<br>(53.0, 68.0) | <0.001             |
| Male, N (%)                     | 75880 (79.6)         | 15901 (66.7)         | 19179 (80.5)         | 20133 (84.5)         | 20667 (86.7)         | <0.001             |
| High school or above, N (%)     | 18674 (19.6)         | 6705 (28.1)          | 4120 (17.3)          | 4055 (17.0)          | 3794 (15.9)          | <0.001             |
| Monthly income ≥ 600 CNY, N (%) | 6151 (6.6)           | 1745 (7.4)           | 1404 (6.0)           | 1528 (6.6)           | 1474 (6.5)           | 0.001              |
| Married, N (%)                  | 87453 (94.4)         | 21648 (92.3)         | 22082 (95.0)         | 21967 (95.1)         | 21756 (95.3)         | <0.001             |
| Current smoking, N (%)          | 32037 (34.3)         | 7588 (32.3)          | 7887 (33.8)          | 8256 (35.5)          | 8306 (35.9)          | <0.001             |
| Current drinking, N (%)         | 35028 (37.5)         | 8387 (35.7)          | 8514 (36.4)          | 8995 (38.6)          | 9132 (39.4)          | <0.001             |
| Active physical activity, N (%) | 14022 (15.2)         | 3509 (15.0)          | 3499 (15.1)          | 3644 (15.8)          | 3370 (14.8)          | 0.820              |

|                                | Overall                 | Quartiles of TyG-WC     |                         |                         |                         | <i>P</i> for trend |
|--------------------------------|-------------------------|-------------------------|-------------------------|-------------------------|-------------------------|--------------------|
|                                |                         | Quartile 1              | Quartile 2              | Quartile 3              | Quartile 4              |                    |
| Family history of ASCVD, N (%) | 10728 (11.3)            | 2833 (11.9)             | 2608 (10.9)             | 2655 (11.1)             | 2632 (11.0)             | 0.011              |
| Hypertension, N (%)            | 32287 (34.0)            | 4322 (18.2)             | 7306 (30.8)             | 9174 (38.6)             | 11485 (48.4)            | <0.001             |
| Diabetes, N (%)                | 8629 (9.1)              | 424 (1.8)               | 1110 (4.7)              | 2147 (9.0)              | 4948 (20.8)             | <0.001             |
| Hyperlipidemia, N (%)          | 12113 (12.7)            | 1712 (7.2)              | 2643 (11.1)             | 3314 (13.9)             | 4444 (18.6)             | <0.001             |
| CKD, N(%)                      | 18972 (19.9)            | 3416 (14.3)             | 4664 (19.6)             | 5021 (21.1)             | 5871 (24.6)             | <0.001             |
| TyG, Median (IQR)              | 8.6 (8.2, 9.1)          | 8.1 (7.8, 8.3)          | 8.4 (8.2, 8.7)          | 8.7 (8.4, 9.1)          | 9.3 (8.9, 9.7)          | <0.001             |
| TyG-BMI, Median (IQR)          | 214.4<br>(189.0, 242.2) | 177.8<br>(163.4, 192.1) | 204.6<br>(191.3, 218.7) | 226.1<br>(211.1, 241.2) | 256.6<br>(237.2, 277.8) | <0.001             |
| TyG-WHtR, Median (IQR)         | 4.5 (4.0, 5.0)          | 3.7 (3.5, 3.9)          | 4.2 (4.1, 4.4)          | 4.7 (4.5, 4.8)          | 5.3 (5.1, 5.6)          | <0.001             |

Values were represented by median (IQR) for continuous variables and frequency (percentage) for categorical variables.

Abbreviations: ASCVD, atherosclerotic cardiovascular disease; BMI, body mass index; CKD, chronic kidney disease; IQR, interquartile range;

TyG, triglyceride-glucose; WC, waist circumference; WHtR, Waist-to-Height ratio.

**Supplementary Table 3. Baseline characteristics of participants according to TyG-WHtR quartiles.**

|                                 | Overall              | Quartiles of TyG-WHtR |                      |                      |                      | <i>P</i> for trend |
|---------------------------------|----------------------|-----------------------|----------------------|----------------------|----------------------|--------------------|
|                                 |                      | Quartile 1            | Quartile 2           | Quartile 3           | Quartile 4           |                    |
| Range of TyG- WHtR              |                      | <4.0                  | 4.0-4.5              | 4.5-5.0              | ≥5.0                 |                    |
| No. of participants             | 95342                | 23835                 | 23836                | 23835                | 23836                |                    |
| Age, years, Median (IQR)        | 59.0<br>(51.0, 66.2) | 55.0<br>(46.0, 63.0)  | 58.0<br>(51.0, 65.8) | 60.0<br>(52.5, 67.0) | 61.5<br>(54.0, 68.8) | <0.001             |
| Male, N (%)                     | 75880 (79.6)         | 17644 (74.0)          | 19494 (81.8)         | 19738 (82.8)         | 19004 (79.7)         | <0.001             |
| High school or above, N (%)     | 18674 (19.6)         | 6715 (28.2)           | 4260 (17.9)          | 4074 (17.1)          | 3625 (15.2)          | <0.001             |
| Monthly income ≥ 600 CNY, N (%) | 6151 (6.6)           | 1748 (7.5)            | 1425 (6.1)           | 1489 (6.5)           | 1489 (6.5)           | <0.001             |
| Married, N (%)                  | 87453 (94.4)         | 21661 (92.4)          | 22142 (95.2)         | 21990 (95.3)         | 21660 (94.9)         | <0.001             |
| Current smoking, N (%)          | 32037 (34.3)         | 8309 (35.4)           | 7951 (34.0)          | 8210 (35.3)          | 7567 (32.7)          | <0.001             |
| Current drinking, N (%)         | 35028 (37.5)         | 9138 (38.9)           | 8608 (36.8)          | 8974 (38.5)          | 8308 (35.9)          | <0.001             |
| Active physical activity, N (%) | 14022 (15.2)         | 3485 (14.9)           | 3343 (14.4)          | 3599 (15.6)          | 3595 (15.8)          | <0.001             |

|                                | Overall                 | Quartiles of TyG-WHtR   |                         |                         |                         | <i>P</i> for trend |
|--------------------------------|-------------------------|-------------------------|-------------------------|-------------------------|-------------------------|--------------------|
|                                |                         | Quartile 1              | Quartile 2              | Quartile 3              | Quartile 4              |                    |
| Family history of ASCVD, N (%) | 10728 (11.3)            | 2750 (11.5)             | 2560 (10.7)             | 2800 (11.7)             | 2618 (11.0)             | 0.474              |
| Hypertension, N (%)            | 32287 (34.0)            | 4320 (18.2)             | 7294 (30.7)             | 9086 (38.3)             | 11587 (48.8)            | <0.001             |
| Diabetes, N (%)                | 8629 (9.1)              | 408 (1.7)               | 1045 (4.4)              | 2179 (9.1)              | 4997 (21.0)             | <0.001             |
| Hyperlipidemia, N (%)          | 12113 (12.7)            | 1688 (7.1)              | 2524 (10.6)             | 3360 (14.1)             | 4541 (19.1)             | <0.001             |
| CKD, N(%)                      | 18972 (19.9)            | 3312 (13.9)             | 4683 (19.7)             | 4861 (20.4)             | 6116 (25.7)             | <0.001             |
| TyG, Median (IQR)              | 8.6 (8.2, 9.1)          | 8.1 (7.8, 8.3)          | 8.4 (8.2, 8.7)          | 8.8 (8.4, 9.1)          | 9.3 (8.9, 9.7)          | <0.001             |
| TyG-BMI, Median (IQR)          | 214.4<br>(189.0, 242.2) | 177.8<br>(163.4, 191.8) | 205.1<br>(191.7, 218.9) | 226.4<br>(211.2, 241.4) | 256.9<br>(237.3, 278.0) | <0.001             |
| TyG-WC, Median (IQR)           | 747.1<br>(671.6, 830.2) | 620.8<br>(582.0, 654.0) | 712.3<br>(688.2, 737.1) | 786.0<br>(758.8, 813.9) | 890.8<br>(851.6, 942.1) | <0.001             |

Values were represented by median (IQR) for continuous variables and frequency (percentage) for categorical variables.

Abbreviations: ASCVD, atherosclerotic cardiovascular disease; BMI, body mass index; CKD, chronic kidney disease; IQR, interquartile range; TyG, triglyceride-glucose; WC, waist circumference; WHtR, Waist-to-Height ratio.

**Supplementary Table 4. Coefficient (95%CI) of each covariate included in the Cox regression models. <sup>a</sup>**

|                 | Reference                   | Category             | ASCVD               |          | MI                  |          | CI                  |          |
|-----------------|-----------------------------|----------------------|---------------------|----------|---------------------|----------|---------------------|----------|
|                 |                             |                      | Coefficient(95%CI)  | <i>P</i> | Coefficient(95%CI)  | <i>P</i> | Coefficient(95%CI)  | <i>P</i> |
| <b>TyG</b>      |                             |                      |                     |          |                     |          |                     |          |
| TyG             | Quartile 1                  | Quartile 2           | 0.26(0.18,0.33)     | <0.001   | 0.30(0.14,0.46)     | <0.001   | 0.24(0.16,0.32)     | <0.001   |
| TyG             | Quartile 1                  | Quartile 3           | 0.43(0.36,0.50)     | <0.001   | 0.62(0.47,0.77)     | <0.001   | 0.37(0.29,0.45)     | <0.001   |
| TyG             | Quartile 1                  | Quartile 4           | 0.70(0.63,0.76)     | <0.001   | 0.94(0.80,1.09)     | <0.001   | 0.63(0.55,0.70)     | <0.001   |
| Age             |                             |                      | 0.05(0.04,0.05)     | <0.001   | 0.05(0.04,0.05)     | <0.001   | 0.04(0.04,0.05)     | <0.001   |
| Gender          | Female                      | Male                 | 0.65(0.57,0.72)     | <0.001   | 0.84(0.67,1.00)     | <0.001   | 0.61(0.52,0.69)     | <0.001   |
| Education level | Illiteracy to Middle school | High school or above | -0.34(-0.42, -0.27) | <0.001   | -0.22(-0.36, -0.07) | 0.004    | -0.39(-0.47, -0.31) | <0.001   |
| Monthly income  | <600 CNY                    | ≥ 600 CNY            | -0.11(-0.21, -0.01) | 0.04     | -0.06(-0.26,0.15)   | 0.60     | -0.13(-0.25, -0.02) | 0.02     |
| Marital status  | Other situations            | Married              | 0.03(-0.08,0.13)    | 0.65     | 0.07(-0.15,0.30)    | 0.51     | 0.01(-0.11,0.13)    | 0.82     |
| Current smoking | No                          | Yes                  | 0.22(0.17,0.28)     | <0.001   | 0.35(0.24,0.46)     | <0.001   | 0.19(0.12,0.25)     | <0.001   |



|                         | Reference                   | Category             | ASCVD               |          | MI                  |          | CI                  |          |
|-------------------------|-----------------------------|----------------------|---------------------|----------|---------------------|----------|---------------------|----------|
|                         |                             |                      | Coefficient(95%CI)  | <i>P</i> | Coefficient(95%CI)  | <i>P</i> | Coefficient(95%CI)  | <i>P</i> |
| Current drinking        | No                          | Yes                  | -0.16(-0.22, -0.10) | <0.001   | -0.42(-0.54, -0.31) | 0.000    | -0.09(-0.15, -0.03) | 0.005    |
| Physical activity       | Inactive                    | Active               | 0.02(-0.04,0.08)    | 0.46     | 0.01(-0.11,0.13)    | 0.87     | 0.02(-0.05,0.09)    | 0.56     |
| Family history of ASCVD | No                          | Yes                  | 0.08(0.01,0.16)     | 0.02     | 0.02(-0.13,0.18)    | 0.77     | 0.10(0.02,0.18)     | 0.02     |
| <b>TyG-BMI</b>          |                             |                      |                     |          |                     |          |                     |          |
| TyG-BMI                 | Quartile 1                  | Quartile 2           | 0.29(0.22,0.37)     | <0.001   | 0.26(0.10,0.42)     | 0.001    | 0.30(0.22,0.38)     | <0.001   |
| TyG-BMI                 | Quartile 1                  | Quartile 3           | 0.47(0.40,0.54)     | <0.001   | 0.51(0.36,0.66)     | <0.001   | 0.46(0.38,0.54)     | <0.001   |
| TyG-BMI                 | Quartile 1                  | Quartile 4           | 0.75(0.68,0.82)     | <0.001   | 0.89(0.74,1.03)     | <0.001   | 0.71(0.63,0.79)     | <0.001   |
| Age                     |                             |                      | 0.05(0.04,0.05)     | <0.001   | 0.05(0.04,0.05)     | <0.001   | 0.04(0.04,0.05)     | <0.001   |
| Gender                  | Female                      | Male                 | 0.64(0.57,0.72)     | <0.001   | 0.83(0.67,1.00)     | <0.001   | 0.60(0.51,0.68)     | <0.001   |
| Education level         | Illiteracy to Middle school | High school or above | -0.34(-0.41, -0.27) | <0.001   | -0.21(-0.36, -0.07) | 0.004    | -0.39(-0.47, -0.30) | <0.001   |

|                         | Reference        | Category   | ASCVD               |          | MI                  |          | CI                  |          |
|-------------------------|------------------|------------|---------------------|----------|---------------------|----------|---------------------|----------|
|                         |                  |            | Coefficient(95%CI)  | <i>P</i> | Coefficient(95%CI)  | <i>P</i> | Coefficient(95%CI)  | <i>P</i> |
| Monthly income          | <600 CNY         | ≥ 600 CNY  | -0.12(-0.22, -0.01) | 0.03     | -0.06(-0.27,0.14)   | 0.55     | -0.14(-0.26, -0.03) | 0.02     |
| Marital status          | Other situations | Married    | 0.03(-0.08,0.13)    | 0.65     | 0.08(-0.15,0.30)    | 0.50     | 0.01(-0.11,0.13)    | 0.84     |
| Current smoking         | No               | Yes        | 0.25(0.19,0.31)     | <0.001   | 0.37(0.26,0.49)     | 0.000    | 0.21(0.15,0.27)     | <0.001   |
| Current drinking        | No               | Yes        | -0.16(-0.22, -0.11) | <0.001   | -0.42(-0.54, -0.31) | 0.000    | -0.09(-0.16, -0.03) | 0.003    |
| Physical activity       | Inactive         | Active     | 0.01(-0.05,0.07)    | 0.76     | -0.01(-0.13,0.12)   | 0.92     | 0.01(-0.06,0.08)    | 0.81     |
| Family history of ASCVD | No               | Yes        | 0.07(0.00,0.15)     | 0.05     | 0.01(-0.15,0.17)    | 0.90     | 0.09(0.01,0.17)     | 0.03     |
| <b>TyG-WC</b>           |                  |            |                     |          |                     |          |                     |          |
| TyG-WC                  | Quartile 1       | Quartile 2 | 0.36(0.29,0.44)     | <0.001   | 0.50(0.33,0.68)     | 0.000    | 0.33(0.24,0.41)     | <0.001   |

|                  | Reference                   | Category             | ASCVD               |          | MI                  |          | CI                  |          |
|------------------|-----------------------------|----------------------|---------------------|----------|---------------------|----------|---------------------|----------|
|                  |                             |                      | Coefficient(95%CI)  | <i>P</i> | Coefficient(95%CI)  | <i>P</i> | Coefficient(95%CI)  | <i>P</i> |
| TyG-WC           | Quartile 1                  | Quartile 3           | 0.53(0.45,0.60)     | <0.001   | 0.77(0.60,0.93)     | 0.000    | 0.46(0.37,0.54)     | <0.001   |
| TyG-WC           | Quartile 1                  | Quartile 4           | 0.83(0.76,0.90)     | <0.001   | 1.12(0.96,1.28)     | 0.000    | 0.76(0.68,0.84)     | <0.001   |
| Age              |                             |                      | 0.04(0.04,0.04)     | <0.001   | 0.04(0.04,0.05)     | 0.000    | 0.04(0.04,0.04)     | <0.001   |
| Gender           | Female                      | Male                 | 0.58(0.50,0.66)     | <0.001   | 0.75(0.58,0.91)     | 0.000    | 0.54(0.46,0.63)     | <0.001   |
| Education level  | Illiteracy to Middle school | High school or above | -0.33(-0.40, -0.26) | <0.001   | -0.20(-0.35, -0.06) | 0.007    | -0.38(-0.46, -0.30) | <0.001   |
| Monthly income   | <600 CNY                    | ≥ 600 CNY            | -0.12(-0.22, -0.02) | 0.02     | -0.07(-0.28,0.14)   | 0.52     | -0.14(-0.26, -0.03) | 0.02     |
| Marital status   | Other situations            | Married              | 0.02(-0.08,0.13)    | 0.65     | 0.08(-0.15,0.30)    | 0.51     | 0.01(-0.11,0.13)    | 0.83     |
| Current smoking  | No                          | Yes                  | 0.24(0.19,0.30)     | <0.001   | 0.37(0.26,0.49)     | 0.000    | 0.20(0.14,0.27)     | <0.001   |
| Current drinking | No                          | Yes                  | -0.17(-0.22, -0.11) | <0.001   | -0.43(-0.54, -0.31) | 0.000    | -0.09(-0.16, -0.03) | 0.003    |

|                         | Reference                   | Category             | ASCVD               |          | MI                  |          | CI                  |          |
|-------------------------|-----------------------------|----------------------|---------------------|----------|---------------------|----------|---------------------|----------|
|                         |                             |                      | Coefficient(95%CI)  | <i>P</i> | Coefficient(95%CI)  | <i>P</i> | Coefficient(95%CI)  | <i>P</i> |
| Physical activity       | Inactive                    | Active               | 0.04(-0.02,0.10)    | 0.23     | 0.03(-0.09,0.15)    | 0.63     | 0.03(-0.03,0.10)    | 0.33     |
| Family history of ASCVD | No                          | Yes                  | 0.08(0.01,0.16)     | 0.03     | 0.02(-0.14,0.17)    | 0.81     | 0.10(0.02,0.18)     | 0.02     |
| <b>TyG-WHtR</b>         |                             |                      |                     |          |                     |          |                     |          |
| TyG-WHtR                | Quartile 1                  | Quartile 2           | 0.33(0.26,0.41)     | <0.001   | 0.42(0.25,0.59)     | 0.000    | 0.30(0.22,0.39)     | <0.001   |
| TyG-WHtR                | Quartile 1                  | Quartile 3           | 0.55(0.48,0.63)     | <0.001   | 0.74(0.58,0.90)     | 0.000    | 0.50(0.41,0.58)     | <0.001   |
| TyG-WHtR                | Quartile 1                  | Quartile 4           | 0.85(0.78,0.92)     | <0.001   | 1.04(0.89,1.20)     | 0.000    | 0.79(0.71,0.87)     | <0.001   |
| Age                     |                             |                      | 0.04(0.04,0.04)     | <0.001   | 0.04(0.04,0.05)     | 0.000    | 0.04(0.04,0.04)     | <0.001   |
| Gender                  | Female                      | Male                 | 0.68(0.61,0.76)     | <0.001   | 0.88(0.71,1.04)     | 0.000    | 0.64(0.56,0.72)     | <0.001   |
| Education level         | Illiteracy to Middle school | High school or above | -0.32(-0.40, -0.25) | <0.001   | -0.19(-0.34, -0.05) | 0.01     | -0.37(-0.45, -0.29) | <0.001   |
| Monthly income          | <600 CNY                    | ≥ 600 CNY            | -0.12(-0.22, -0.02) | 0.02     | -0.07(-0.27,0.14)   | 0.53     | -0.14(-0.26, -0.03) | 0.02     |

|                         | Reference        | Category | ASCVD               |          | MI                  |          | CI                  |          |
|-------------------------|------------------|----------|---------------------|----------|---------------------|----------|---------------------|----------|
|                         |                  |          | Coefficient(95%CI)  | <i>P</i> | Coefficient(95%CI)  | <i>P</i> | Coefficient(95%CI)  | <i>P</i> |
| Marital status          | Other situations | Married  | 0.04(-0.07,0.14)    | 0.52     | 0.09(-0.13,0.31)    | 0.43     | 0.02(-0.10,0.14)    | 0.71     |
| Current smoking         | No               | Yes      | 0.24(0.19,0.30)     | <0.001   | 0.37(0.25,0.48)     | 0.000    | 0.20(0.14,0.26)     | <0.001   |
| Current drinking        | No               | Yes      | -0.16(-0.22, -0.11) | <0.001   | -0.42(-0.54, -0.31) | 0.000    | -0.09(-0.16, -0.03) | 0.004    |
| Physical activity       | Inactive         | Active   | 0.03(-0.03,0.09)    | 0.27     | 0.02(-0.10,0.15)    | 0.70     | 0.03(-0.04,0.10)    | 0.36     |
| Family history of ASCVD | No               | Yes      | 0.08(0.01,0.16)     | 0.02     | 0.02(-0.13,0.18)    | 0.79     | 0.10(0.02,0.18)     | 0.02     |

<sup>a</sup> Cox proportional hazard regression model, adjusted for age, gender, monthly income, education level, marital status, current smoking, current drinking, physical activity, and family history of atherosclerotic cardiovascular diseases.

Abbreviations: ASCVD, atherosclerotic cardiovascular diseases; BMI, body mass index; HR (95%CI), hazard ratio (95% confidence interval); IQR, interquartile range; TyG, triglyceride-glucose; WC, waist circumference; WHtR, Waist-to-Height ratio.

**Supplementary Table 5. Subgroup analyses of TyG and its related parameters with atherosclerotic cardiovascular disease.**

| HR (95%CI) <sup>a</sup>  |           | Quartiles  |                 |                 |                 | Continuous         | P for interaction |
|--------------------------|-----------|------------|-----------------|-----------------|-----------------|--------------------|-------------------|
|                          |           | Quartile 1 | Quartile 2      | Quartile 3      | Quartile 4      | Per 1 IQR Increase |                   |
| <b>TyG</b>               |           |            |                 |                 |                 |                    |                   |
| Age group                | <60 years | Reference  | 1.54(1.35,1.75) | 1.77(1.56,2.01) | 2.48(2.20,2.79) | 1.47(1.40,1.53)    | <0.001            |
|                          | ≥60 years | Reference  | 1.16(1.07,1.27) | 1.40(1.29,1.52) | 1.72(1.59,1.87) | 1.32(1.27,1.37)    |                   |
| Gender                   | Female    | Reference  | 1.37(1.08,1.73) | 1.86(1.49,2.32) | 2.72(2.19,3.37) | 1.59(1.46,1.73)    | <0.001            |
|                          | Male      | Reference  | 1.27(1.18,1.37) | 1.49(1.38,1.60) | 1.90(1.77,2.04) | 1.36(1.32,1.40)    |                   |
| Current smoking          | No        | Reference  | 1.28(1.16,1.40) | 1.57(1.43,1.72) | 2.12(1.94,2.31) | 1.43(1.38,1.48)    | 0.03              |
|                          | Yes       | Reference  | 1.31(1.17,1.47) | 1.49(1.34,1.67) | 1.82(1.64,2.03) | 1.33(1.27,1.39)    |                   |
| Current drinking         | No        | Reference  | 1.33(1.21,1.46) | 1.66(1.51,1.81) | 2.20(2.02,2.40) | 1.44(1.39,1.49)    | <0.001            |
|                          | Yes       | Reference  | 1.25(1.11,1.40) | 1.38(1.23,1.54) | 1.74(1.56,1.93) | 1.32(1.26,1.38)    |                   |
| Active physical activity | No        | Reference  | 1.35(1.24,1.46) | 1.58(1.46,1.71) | 2.09(1.94,2.26) | 1.41(1.37,1.45)    | 0.05              |
|                          | Yes       | Reference  | 1.09(0.93,1.28) | 1.42(1.22,1.65) | 1.69(1.46,1.96) | 1.31(1.23,1.40)    |                   |
| Hypertension             | No        | Reference  | 1.25(1.13,1.38) | 1.49(1.35,1.64) | 1.98(1.80,2.18) | 1.40(1.34,1.45)    | 0.01              |
|                          | Yes       | Reference  | 1.17(1.06,1.31) | 1.29(1.17,1.43) | 1.53(1.39,1.68) | 1.23(1.18,1.28)    |                   |

| HR (95%CI) <sup>a</sup> |           | Quartiles  |                 |                 |                 | Continuous         | P for interaction |
|-------------------------|-----------|------------|-----------------|-----------------|-----------------|--------------------|-------------------|
|                         |           | Quartile 1 | Quartile 2      | Quartile 3      | Quartile 4      | Per 1 IQR Increase |                   |
| Diabetes                | No        | Reference  | 1.27(1.18,1.37) | 1.49(1.39,1.60) | 1.73(1.60,1.86) | 1.31(1.27,1.35)    | 0.66              |
|                         | Yes       | Reference  | 1.38(0.90,2.13) | 1.35(0.91,2.02) | 1.66(1.13,2.43) | 1.17(1.09,1.25)    |                   |
| Hyperlipidemia          | No        | Reference  | 1.31(1.21,1.42) | 1.54(1.43,1.66) | 2.01(1.87,2.16) | 1.40(1.35,1.44)    | 0.04              |
|                         | Yes       | Reference  | 0.99(0.80,1.23) | 1.20(0.98,1.46) | 1.46(1.21,1.77) | 1.25(1.17,1.33)    |                   |
| <b>TyG-BMI</b>          |           |            |                 |                 |                 |                    |                   |
| Age group               | <60 years | Reference  | 1.62(1.42,1.84) | 1.92(1.69,2.18) | 2.61(2.31,2.94) | 1.57(1.49,1.65)    | <0.001            |
|                         | ≥60 years | Reference  | 1.19(1.09,1.30) | 1.40(1.29,1.53) | 1.83(1.68,1.99) | 1.37(1.32,1.42)    |                   |
| Gender                  | Female    | Reference  | 1.33(1.06,1.68) | 1.80(1.45,2.24) | 2.50(2.03,3.08) | 1.55(1.42,1.69)    | 0.02              |
|                         | Male      | Reference  | 1.33(1.23,1.44) | 1.56(1.44,1.68) | 2.04(1.90,2.19) | 1.43(1.39,1.48)    |                   |
| Current smoking         | No        | Reference  | 1.37(1.25,1.51) | 1.69(1.54,1.85) | 2.20(2.01,2.40) | 1.46(1.41,1.52)    | 0.31              |
|                         | Yes       | Reference  | 1.30(1.16,1.46) | 1.48(1.32,1.65) | 2.00(1.80,2.23) | 1.45(1.38,1.52)    |                   |
| Current drinking        | No        | Reference  | 1.42(1.29,1.56) | 1.76(1.61,1.93) | 2.32(2.13,2.54) | 1.51(1.45,1.56)    | <0.001            |
|                         | Yes       | Reference  | 1.24(1.10,1.39) | 1.38(1.23,1.54) | 1.84(1.65,2.05) | 1.38(1.31,1.45)    |                   |
|                         | No        | Reference  | 1.37(1.26,1.48) | 1.63(1.50,1.76) | 2.18(2.02,2.35) | 1.48(1.43,1.53)    | 0.38              |

| HR (95%CI) <sup>a</sup>  |           | Quartiles  |                 |                 |                 | Continuous         | P for interaction |
|--------------------------|-----------|------------|-----------------|-----------------|-----------------|--------------------|-------------------|
|                          |           | Quartile 1 | Quartile 2      | Quartile 3      | Quartile 4      | Per 1 IQR Increase |                   |
| Active physical activity | Yes       | Reference  | 1.25(1.06,1.47) | 1.49(1.27,1.75) | 1.86(1.60,2.17) | 1.37(1.27,1.47)    | 0.07              |
|                          | No        | Reference  | 1.27(1.15,1.40) | 1.51(1.37,1.66) | 1.94(1.76,2.14) | 1.42(1.36,1.49)    |                   |
| Hypertension             | Yes       | Reference  | 1.19(1.06,1.33) | 1.28(1.15,1.43) | 1.54(1.38,1.71) | 1.23(1.18,1.29)    | 0.01              |
|                          | No        | Reference  | 1.30(1.21,1.41) | 1.53(1.42,1.64) | 1.97(1.83,2.12) | 1.42(1.37,1.47)    |                   |
| Diabetes                 | Yes       | Reference  | 1.31(0.98,1.75) | 1.32(1.00,1.74) | 1.41(1.09,1.84) | 1.11(1.03,1.20)    | 0.62              |
|                          | No        | Reference  | 1.35(1.25,1.46) | 1.60(1.48,1.73) | 2.10(1.95,2.26) | 1.45(1.41,1.50)    |                   |
| Hyperlipidemia           | Yes       | Reference  | 1.19(0.97,1.47) | 1.39(1.15,1.69) | 1.80(1.50,2.17) | 1.35(1.26,1.45)    |                   |
| <b>TyG-WC</b>            |           |            |                 |                 |                 |                    |                   |
| Age group                | <60 years | Reference  | 1.63(1.43,1.86) | 2.07(1.82,2.36) | 2.91(2.57,3.29) | 1.65(1.57,1.73)    | <0.001            |
|                          | ≥60 years | Reference  | 1.29(1.17,1.42) | 1.45(1.32,1.59) | 1.92(1.76,2.10) | 1.40(1.35,1.46)    |                   |
| Gender                   | Female    | Reference  | 1.79(1.44,2.23) | 2.49(2.01,3.08) | 2.72(2.19,3.37) | 1.64(1.50,1.80)    | <0.001            |
|                          | Male      | Reference  | 1.37(1.26,1.48) | 1.58(1.46,1.71) | 2.19(2.03,2.36) | 1.48(1.43,1.53)    |                   |
| Current smoking          | No        | Reference  | 1.52(1.37,1.68) | 1.83(1.66,2.02) | 2.46(2.24,2.70) | 1.53(1.48,1.59)    | 0.07              |



| HR (95%CI) <sup>a</sup>  |           | Quartiles  |                 |                 |                 | Continuous         | P for interaction |
|--------------------------|-----------|------------|-----------------|-----------------|-----------------|--------------------|-------------------|
|                          |           | Quartile 1 | Quartile 2      | Quartile 3      | Quartile 4      | Per 1 IQR Increase |                   |
| Current drinking         | Yes       | Reference  | 1.32(1.17,1.49) | 1.52(1.35,1.70) | 2.08(1.86,2.32) | 1.46(1.39,1.53)    | 0.02              |
|                          | No        | Reference  | 1.51(1.37,1.67) | 1.85(1.68,2.04) | 2.50(2.28,2.75) | 1.55(1.49,1.61)    |                   |
|                          | Yes       | Reference  | 1.33(1.17,1.50) | 1.48(1.31,1.67) | 2.02(1.80,2.27) | 1.43(1.36,1.51)    |                   |
| Active physical activity | No        | Reference  | 1.46(1.33,1.59) | 1.73(1.59,1.89) | 2.38(2.20,2.58) | 1.53(1.48,1.58)    | 0.12              |
|                          | Yes       | Reference  | 1.37(1.16,1.62) | 1.55(1.32,1.82) | 1.97(1.68,2.30) | 1.41(1.32,1.52)    |                   |
| Hypertension             | No        | Reference  | 1.38(1.24,1.53) | 1.55(1.40,1.72) | 2.15(1.95,2.38) | 1.48(1.42,1.55)    | 0.01              |
|                          | Yes       | Reference  | 1.24(1.10,1.39) | 1.40(1.25,1.56) | 1.71(1.53,1.90) | 1.30(1.25,1.36)    |                   |
| Diabetes                 | No        | Reference  | 1.39(1.28,1.50) | 1.57(1.46,1.70) | 2.07(1.92,2.24) | 1.44(1.39,1.49)    | 0.02              |
|                          | Yes       | Reference  | 1.65(1.13,2.40) | 1.93(1.36,2.75) | 2.07(1.47,2.93) | 1.23(1.14,1.33)    |                   |
| Hyperlipidemia           | No        | Reference  | 1.42(1.31,1.55) | 1.69(1.56,1.83) | 2.27(2.10,2.45) | 1.50(1.45,1.55)    | 0.45              |
|                          | Yes       | Reference  | 1.35(1.08,1.68) | 1.48(1.20,1.83) | 1.97(1.61,2.40) | 1.38(1.29,1.49)    |                   |
| <b>TyG-WHtR</b>          |           |            |                 |                 |                 |                    |                   |
| Age group                | <60 years | Reference  | 1.68(1.48,1.91) | 2.07(1.82,2.34) | 2.94(2.61,3.32) | 1.68(1.60,1.77)    | <0.001            |
|                          | ≥60 years | Reference  | 1.20(1.09,1.32) | 1.49(1.36,1.63) | 1.95(1.78,2.13) | 1.42(1.37,1.47)    |                   |

| HR (95%CI) <sup>a</sup>  |        | Quartiles  |                 |                 |                 | Continuous         | P for interaction |
|--------------------------|--------|------------|-----------------|-----------------|-----------------|--------------------|-------------------|
|                          |        | Quartile 1 | Quartile 2      | Quartile 3      | Quartile 4      | Per 1 IQR Increase |                   |
| Gender                   | Female | Reference  | 1.51(1.16,1.98) | 2.45(1.91,3.15) | 3.07(2.41,3.91) | 1.64(1.51,1.79)    | <0.001            |
|                          | Male   | Reference  | 1.37(1.27,1.49) | 1.66(1.53,1.79) | 2.23(2.07,2.41) | 1.50(1.45,1.55)    |                   |
| Current smoking          | No     | Reference  | 1.43(1.29,1.58) | 1.80(1.63,1.98) | 2.44(2.22,2.68) | 1.55(1.49,1.61)    | 0.52              |
|                          | Yes    | Reference  | 1.35(1.20,1.52) | 1.66(1.48,1.86) | 2.18(1.96,2.44) | 1.49(1.42,1.56)    |                   |
| Current drinking         | No     | Reference  | 1.46(1.32,1.62) | 1.87(1.70,2.06) | 2.51(2.29,2.76) | 1.56(1.50,1.62)    | 0.14              |
|                          | Yes    | Reference  | 1.30(1.15,1.47) | 1.56(1.39,1.75) | 2.11(1.88,2.36) | 1.47(1.40,1.54)    |                   |
| Active physical activity | No     | Reference  | 1.44(1.32,1.57) | 1.77(1.63,1.93) | 2.41(2.22,2.61) | 1.54(1.49,1.59)    | 0.18              |
|                          | Yes    | Reference  | 1.22(1.03,1.45) | 1.60(1.36,1.88) | 2.05(1.76,2.40) | 1.45(1.36,1.56)    |                   |
| Hypertension             | No     | Reference  | 1.30(1.18,1.44) | 1.63(1.47,1.80) | 2.16(1.96,2.39) | 1.50(1.44,1.57)    | <0.01             |
|                          | Yes    | Reference  | 1.24(1.10,1.40) | 1.42(1.26,1.58) | 1.76(1.58,1.96) | 1.32(1.27,1.38)    |                   |
| Diabetes                 | No     | Reference  | 1.36(1.26,1.47) | 1.61(1.49,1.74) | 2.11(1.96,2.28) | 1.46(1.41,1.51)    | 0.01              |
|                          | Yes    | Reference  | 1.54(1.05,2.25) | 2.03(1.42,2.90) | 2.10(1.48,2.97) | 1.27(1.18,1.37)    |                   |
| Hyperlipidemia           | No     | Reference  | 1.38(1.27,1.50) | 1.74(1.60,1.88) | 2.30(2.13,2.48) | 1.52(1.47,1.57)    | 0.31              |
|                          | Yes    | Reference  | 1.35(1.09,1.69) | 1.49(1.21,1.84) | 2.04(1.67,2.49) | 1.42(1.32,1.53)    |                   |

| <b>HR (95%CI) <sup>a</sup></b> | <b>Quartiles</b>  |                   |                   |                   | <b>Continuous</b>         | <b>P for interaction</b> |
|--------------------------------|-------------------|-------------------|-------------------|-------------------|---------------------------|--------------------------|
|                                | <b>Quartile 1</b> | <b>Quartile 2</b> | <b>Quartile 3</b> | <b>Quartile 4</b> | <b>Per 1 IQR Increase</b> |                          |
| Yes                            | Reference         | 1.41(1.10,1.82)   | 1.45(1.14,1.85)   | 2.06(1.64,2.59)   | 1.43(1.31,1.55)           |                          |

<sup>a</sup> Cox proportional hazard regression model, adjusted for age, gender, monthly income, education level, marital status, current smoking, current drinking, physical activity, and family history of atherosclerotic cardiovascular diseases.

Abbreviations: ASCVD, atherosclerotic cardiovascular disease; BMI, body mass index; HR (95%CI), hazard ratio (95% confidence interval); IQR, interquartile range; TyG, triglyceride-glucose; WC, waist circumference; WHtR, Waist-to-Height ratio.

**Supplementary Table 6. Sensitivity analyses for association of TyG and its related parameters with atherosclerotic cardiovascular disease and its subtypes.**

| HR (95%CI)                                                                       | Quartiles  |                   |                   |                   | Continuous         |
|----------------------------------------------------------------------------------|------------|-------------------|-------------------|-------------------|--------------------|
|                                                                                  | Quartile 1 | Quartile 2        | Quartile 3        | Quartile 4        | Per 1 IQR Increase |
| <b>Excluding ASCVD events occurred during the initial two years of follow-up</b> |            |                   |                   |                   |                    |
| <b>ASCVD</b>                                                                     |            |                   |                   |                   |                    |
| TyG                                                                              | Reference  | 1.26 (1.16, 1.36) | 1.54 (1.43, 1.66) | 1.97 (1.84, 2.12) | 1.39 (1.35, 1.43)  |
| TyG-BMI                                                                          | Reference  | 1.33 (1.24, 1.44) | 1.57 (1.46, 1.69) | 2.10 (1.96, 2.25) | 1.45 (1.41, 1.50)  |
| TyG-WC                                                                           | Reference  | 1.42 (1.31, 1.53) | 1.68 (1.55, 1.81) | 2.28 (2.12, 2.46) | 1.50 (1.45, 1.55)  |
| TyG-WHtR                                                                         | Reference  | 1.38 (1.27, 1.50) | 1.72 (1.60, 1.86) | 2.32 (2.15, 2.50) | 1.51 (1.47, 1.56)  |
| <b>Myocardial Infarction</b>                                                     |            |                   |                   |                   |                    |
| TyG                                                                              | Reference  | 1.32 (1.11, 1.56) | 1.94 (1.65, 2.27) | 2.54 (2.18, 2.96) | 1.51 (1.43, 1.61)  |
| TyG-BMI                                                                          | Reference  | 1.30 (1.10, 1.54) | 1.70 (1.45, 1.99) | 2.43 (2.09, 2.82) | 1.54 (1.45, 1.65)  |
| TyG-WC                                                                           | Reference  | 1.69 (1.41, 2.03) | 2.18 (1.83, 2.60) | 3.10 (2.61, 3.67) | 1.64 (1.54, 1.75)  |
| TyG-WHtR                                                                         | Reference  | 1.57 (1.31, 1.88) | 2.22 (1.87, 2.63) | 2.92 (2.48, 3.45) | 1.64 (1.53, 1.74)  |
| <b>Ischemic Stroke</b>                                                           |            |                   |                   |                   |                    |
| TyG                                                                              | Reference  | 1.24 (1.14, 1.35) | 1.44 (1.33, 1.56) | 1.84 (1.70, 1.99) | 1.35 (1.31, 1.39)  |

| HR (95%CI) | Quartiles  |                   |                   |                   | Continuous         |
|------------|------------|-------------------|-------------------|-------------------|--------------------|
|            | Quartile 1 | Quartile 2        | Quartile 3        | Quartile 4        | Per 1 IQR Increase |
| TyG-BMI    | Reference  | 1.33 (1.23, 1.45) | 1.53 (1.41, 1.66) | 2.00 (1.85, 2.17) | 1.42 (1.37, 1.47)  |
| TyG-WC     | Reference  | 1.35 (1.24, 1.47) | 1.56 (1.43, 1.70) | 2.11 (1.94, 2.29) | 1.46 (1.41, 1.51)  |
| TyG-WHtR   | Reference  | 1.32 (1.21, 1.45) | 1.61 (1.48, 1.75) | 2.17 (2.00, 2.36) | 1.48 (1.43, 1.53)  |

**Using the updated mean instead of baseline measurements of TyG index and its related parameters**

**ASCVD**

|          |           |                   |                   |                   |                   |
|----------|-----------|-------------------|-------------------|-------------------|-------------------|
| TyG      | Reference | 1.12 (1.04, 1.20) | 1.27 (1.18, 1.36) | 1.53 (1.42, 1.64) | 1.25 (1.21, 1.29) |
| TyG-BMI  | Reference | 1.18 (1.10, 1.27) | 1.35 (1.26, 1.45) | 1.63 (1.52, 1.75) | 1.29 (1.25, 1.33) |
| TyG-WC   | Reference | 1.25 (1.16, 1.35) | 1.41 (1.31, 1.52) | 1.79 (1.66, 1.92) | 1.35 (1.31, 1.39) |
| TyG-WHtR | Reference | 1.24 (1.14, 1.33) | 1.48 (1.38, 1.60) | 1.85 (1.72, 1.99) | 1.39 (1.35, 1.43) |

**Myocardial Infarction**

|          |           |                   |                   |                   |                   |
|----------|-----------|-------------------|-------------------|-------------------|-------------------|
| TyG      | Reference | 1.19 (1.02, 1.39) | 1.44 (1.24, 1.67) | 1.86 (1.60, 2.15) | 1.33 (1.26, 1.42) |
| TyG-BMI  | Reference | 1.10 (0.94, 1.28) | 1.42 (1.22, 1.64) | 1.73 (1.50, 2.00) | 1.34 (1.26, 1.43) |
| TyG-WC   | Reference | 1.50 (1.27, 1.77) | 1.56 (1.33, 1.84) | 2.28 (1.94, 2.67) | 1.43 (1.34, 1.52) |
| TyG-WHtR | Reference | 1.36 (1.15, 1.60) | 1.64 (1.40, 1.92) | 2.21 (1.89, 2.58) | 1.45 (1.37, 1.54) |

**Ischemic Stroke**

| HR (95%CI)                                                             | Quartiles  |                   |                   |                   | Continuous         |
|------------------------------------------------------------------------|------------|-------------------|-------------------|-------------------|--------------------|
|                                                                        | Quartile 1 | Quartile 2        | Quartile 3        | Quartile 4        | Per 1 IQR Increase |
| TyG                                                                    | Reference  | 1.09 (1.01, 1.18) | 1.21 (1.12, 1.31) | 1.44 (1.33, 1.55) | 1.22 (1.18, 1.26)  |
| TyG-BMI                                                                | Reference  | 1.19 (1.10, 1.29) | 1.33 (1.23, 1.44) | 1.58 (1.46, 1.71) | 1.26 (1.22, 1.31)  |
| TyG-WC                                                                 | Reference  | 1.18 (1.09, 1.29) | 1.35 (1.24, 1.47) | 1.67 (1.54, 1.81) | 1.32 (1.27, 1.37)  |
| TyG-WHtR                                                               | Reference  | 1.19 (1.09, 1.30) | 1.43 (1.31, 1.55) | 1.74 (1.61, 1.89) | 1.36 (1.32, 1.41)  |
| <b>Further adjusting for hypertension, diabetes and hyperlipidemia</b> |            |                   |                   |                   |                    |
| <b>ASCVD</b>                                                           |            |                   |                   |                   |                    |
| TyG                                                                    | Reference  | 1.21 (1.12, 1.30) | 1.34 (1.25, 1.44) | 1.51 (1.40, 1.62) | 1.21 (1.17, 1.25)  |
| TyG-BMI                                                                | Reference  | 1.23 (1.14, 1.32) | 1.36 (1.26, 1.46) | 1.57 (1.46, 1.69) | 1.24 (1.20, 1.28)  |
| TyG-WC                                                                 | Reference  | 1.32 (1.22, 1.42) | 1.46 (1.35, 1.57) | 1.75 (1.62, 1.88) | 1.30 (1.26, 1.34)  |
| TyG-WHtR                                                               | Reference  | 1.29 (1.19, 1.39) | 1.49 (1.39, 1.61) | 1.79 (1.66, 1.92) | 1.32 (1.28, 1.36)  |
| <b>Myocardial Infarction</b>                                           |            |                   |                   |                   |                    |
| TyG                                                                    | Reference  | 1.27 (1.08, 1.50) | 1.62 (1.39, 1.89) | 1.94 (1.67, 2.27) | 1.31 (1.23, 1.40)  |
| TyG-BMI                                                                | Reference  | 1.20 (1.02, 1.40) | 1.42 (1.22, 1.65) | 1.81 (1.56, 2.10) | 1.31 (1.23, 1.40)  |
| TyG-WC                                                                 | Reference  | 1.54 (1.29, 1.83) | 1.88 (1.59, 2.22) | 2.35 (1.99, 2.77) | 1.42 (1.33, 1.52)  |
| TyG-WHtR                                                               | Reference  | 1.41 (1.19, 1.67) | 1.83 (1.55, 2.15) | 2.17 (1.84, 2.55) | 1.41 (1.32, 1.51)  |

| HR (95%CI)                                                                                                                        | Quartiles  |                   |                   |                   | Continuous         |
|-----------------------------------------------------------------------------------------------------------------------------------|------------|-------------------|-------------------|-------------------|--------------------|
|                                                                                                                                   | Quartile 1 | Quartile 2        | Quartile 3        | Quartile 4        | Per 1 IQR Increase |
| <b>Ischemic Stroke</b>                                                                                                            |            |                   |                   |                   |                    |
| TyG                                                                                                                               | Reference  | 1.19 (1.10, 1.29) | 1.26 (1.16, 1.36) | 1.40 (1.29, 1.51) | 1.17 (1.13, 1.21)  |
| TyG-BMI                                                                                                                           | Reference  | 1.23 (1.14, 1.34) | 1.33 (1.23, 1.44) | 1.50 (1.38, 1.63) | 1.21 (1.17, 1.26)  |
| TyG-WC                                                                                                                            | Reference  | 1.27 (1.16, 1.38) | 1.35 (1.24, 1.47) | 1.62 (1.49, 1.76) | 1.26 (1.21, 1.31)  |
| TyG-WHtR                                                                                                                          | Reference  | 1.24 (1.14, 1.35) | 1.41 (1.29, 1.53) | 1.68 (1.55, 1.82) | 1.29 (1.24, 1.33)  |
| <b>Adopting the Cox regression model with time-varying variables updated in each survey before the occurrence of ASCVD events</b> |            |                   |                   |                   |                    |
| <b>ASCVD</b>                                                                                                                      |            |                   |                   |                   |                    |
| TyG                                                                                                                               | Reference  | 1.30 (1.08, 1.56) | 1.58 (1.33, 1.88) | 2.00 (1.69, 2.36) | 1.39 (1.31, 1.49)  |
| TyG-BMI                                                                                                                           | Reference  | 1.31 (1.09, 1.57) | 1.75 (1.47, 2.08) | 1.98 (1.67, 2.35) | 1.42 (1.33, 1.52)  |
| TyG-WC                                                                                                                            | Reference  | 1.67 (1.38, 2.01) | 1.69 (1.40, 2.04) | 2.21 (1.85, 2.65) | 1.45 (1.35, 1.56)  |
| TyG-WHtR                                                                                                                          | Reference  | 1.48 (1.23, 1.79) | 1.76 (1.47, 2.11) | 2.08 (1.74, 2.48) | 1.44 (1.34, 1.54)  |
| <b>Myocardial Infarction</b>                                                                                                      |            |                   |                   |                   |                    |
| TyG                                                                                                                               | Reference  | 1.31 (0.91, 1.87) | 1.50 (1.06, 2.13) | 2.30 (1.66, 3.18) | 1.45 (1.28, 1.65)  |
| TyG-BMI                                                                                                                           | Reference  | 1.42 (1.00, 2.02) | 1.68 (1.19, 2.36) | 2.07 (1.48, 2.88) | 1.43 (1.25, 1.63)  |
| TyG-WC                                                                                                                            | Reference  | 1.71 (1.17, 2.49) | 1.92 (1.33, 2.78) | 2.26 (1.58, 3.24) | 1.51 (1.32, 1.72)  |

| HR (95%CI)                                                                                                                    | Quartiles  |                   |                   |                   | Continuous         |
|-------------------------------------------------------------------------------------------------------------------------------|------------|-------------------|-------------------|-------------------|--------------------|
|                                                                                                                               | Quartile 1 | Quartile 2        | Quartile 3        | Quartile 4        | Per 1 IQR Increase |
| TyG-WHtR                                                                                                                      | Reference  | 1.50 (1.04, 2.17) | 1.89 (1.33, 2.69) | 2.07 (1.46, 2.93) | 1.48 (1.30, 1.69)  |
| <b>Ischemic Stroke</b>                                                                                                        |            |                   |                   |                   |                    |
| TyG                                                                                                                           | Reference  | 1.30 (1.05, 1.60) | 1.59 (1.30, 1.94) | 1.93 (1.59, 2.34) | 1.39 (1.29, 1.49)  |
| TyG-BMI                                                                                                                       | Reference  | 1.25 (1.01, 1.54) | 1.77 (1.45, 2.15) | 1.96 (1.61, 2.38) | 1.42 (1.32, 1.54)  |
| TyG-WC                                                                                                                        | Reference  | 1.64 (1.32, 2.03) | 1.58 (1.28, 1.96) | 2.22 (1.81, 2.72) | 1.45 (1.33, 1.57)  |
| TyG-WHtR                                                                                                                      | Reference  | 1.49 (1.20, 1.85) | 1.71 (1.39, 2.11) | 2.11 (1.72, 2.58) | 1.44 (1.33, 1.55)  |
| <b>Adopting the Fine &amp; Gary sub-distribution hazard models to further consider the competing risk of non-ASCVD deaths</b> |            |                   |                   |                   |                    |
| <b>ASCVD</b>                                                                                                                  |            |                   |                   |                   |                    |
| TyG                                                                                                                           | Reference  | 1.30 (1.21, 1.40) | 1.55 (1.44, 1.66) | 2.00 (1.87, 2.14) | 1.38 (1.35, 1.42)  |
| TyG-BMI                                                                                                                       | Reference  | 1.37 (1.27, 1.48) | 1.64 (1.53, 1.76) | 2.16 (2.01, 2.31) | 1.46 (1.42, 1.50)  |
| TyG-WC                                                                                                                        | Reference  | 1.45 (1.35, 1.57) | 1.70 (1.58, 1.84) | 2.28 (2.12, 2.45) | 1.49 (1.44, 1.53)  |
| TyG-WHtR                                                                                                                      | Reference  | 1.40 (1.30, 1.51) | 1.73 (1.61, 1.87) | 2.29 (2.13, 2.46) | 1.50 (1.46, 1.54)  |
| <b>Myocardial Infarction</b>                                                                                                  |            |                   |                   |                   |                    |
| TyG                                                                                                                           | Reference  | 1.36 (1.16, 1.60) | 1.86 (1.60, 2.16) | 2.55 (2.21, 2.95) | 1.50 (1.43, 1.58)  |
| TyG-BMI                                                                                                                       | Reference  | 1.32 (1.13, 1.54) | 1.70 (1.47, 1.98) | 2.46 (2.14, 2.83) | 1.55 (1.46, 1.64)  |



| HR (95%CI)             | Quartiles  |                   |                   |                   | Continuous         |
|------------------------|------------|-------------------|-------------------|-------------------|--------------------|
|                        | Quartile 1 | Quartile 2        | Quartile 3        | Quartile 4        | Per 1 IQR Increase |
| TyG-WC                 | Reference  | 1.67 (1.41, 1.99) | 2.16 (1.82, 2.55) | 3.03 (2.58, 3.56) | 1.63 (1.54, 1.72)  |
| TyG-WHtR               | Reference  | 1.52 (1.28, 1.80) | 2.09 (1.78, 2.46) | 2.78 (2.38, 3.25) | 1.61 (1.52, 1.71)  |
| <b>Ischemic Stroke</b> |            |                   |                   |                   |                    |
| TyG                    | Reference  | 1.28 (1.19, 1.39) | 1.46 (1.35, 1.57) | 1.86 (1.72, 2.00) | 1.35 (1.31, 1.39)  |
| TyG-BMI                | Reference  | 1.38 (1.27, 1.50) | 1.61 (1.49, 1.75) | 2.07 (1.92, 2.23) | 1.43 (1.38, 1.48)  |
| TyG-WC                 | Reference  | 1.40 (1.29, 1.53) | 1.58 (1.46, 1.72) | 2.12 (1.96, 2.30) | 1.45 (1.40, 1.50)  |
| TyG-WHtR               | Reference  | 1.36 (1.25, 1.48) | 1.63 (1.51, 1.78) | 2.16 (1.99, 2.34) | 1.46 (1.41, 1.51)  |

Abbreviations: ASCVD, atherosclerotic cardiovascular disease; BMI, body mass index; HR (95%CI), hazard ratio (95% confidence interval); IQR, interquartile range; TyG, triglyceride-glucose; WC, waist circumference; WHtR, Waist-to-Height ratio.

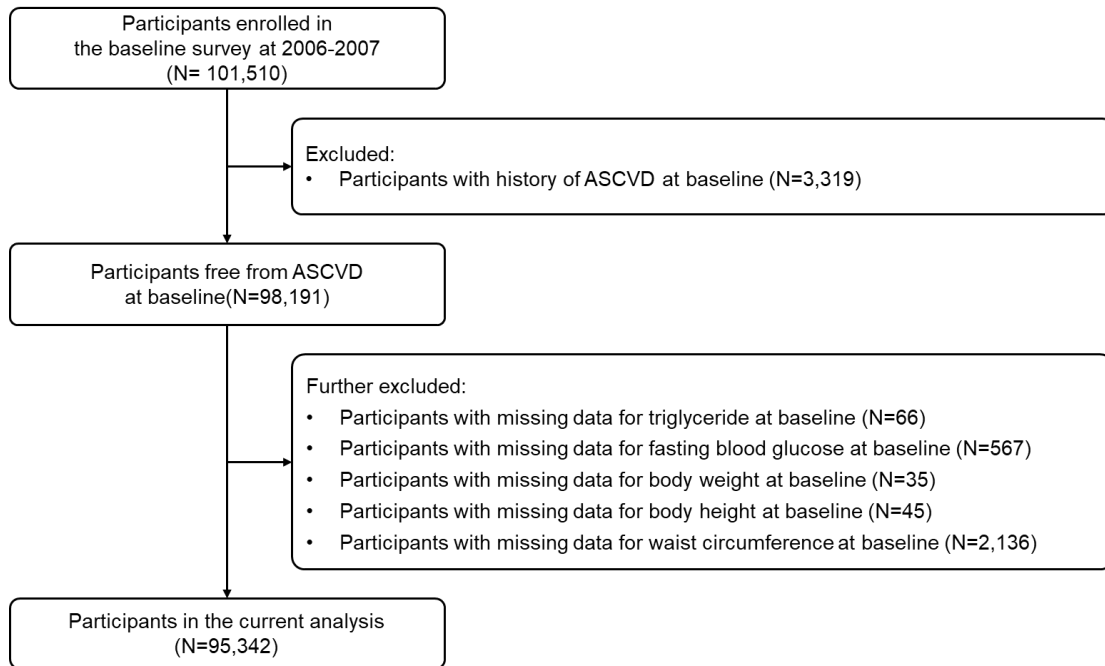

**Supplementary Figure 1. Flow chart of participants included and excluded in the analyses.**

Abbreviations: ASCVD, atherosclerotic cardiovascular disease.

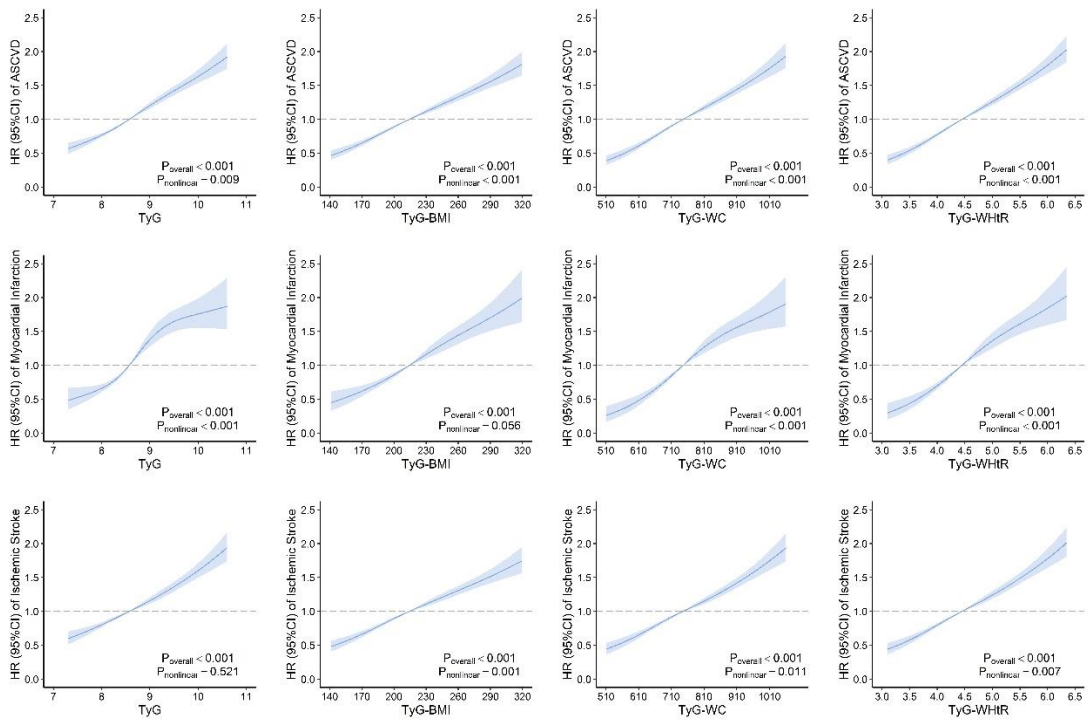

**Supplementary Figure 2. Restricted cubic spline curves of the association of triglyceride-glucose and its related parameters with atherosclerotic cardiovascular disease and its subtypes.**

Abbreviations: ASCVD, atherosclerotic cardiovascular disease; BMI, body mass index; HR (95%CI), hazard ratio (95% confidence interval); IQR, interquartile range; TyG, triglyceride-glucose; WC, waist circumference; WHtR, Waist-to-Height ratio.
